# Supplementary material for: Determinants of Hurricane Evacuation from a Large Representative Sample of the U.S. Gulf Coast
Source: MDPI journal article supplement (doi:10.3390/ijerph16214268), 2019-11-03
Supplement: s1 [file s1]

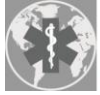

## SUPPLEMENTAL FILE: SURVEY INSTRUMENT

Thank you for your interest in completing our survey. This survey will ask you about your perceptions of climate change and coastal hazards as well as your experience with disasters. Participation in this survey is voluntary. To participate you must be 18 years of age or older. You must also be a resident of a coastal county or parish. You have a right to withdraw from the study at any time without consequences. The information you share is anonymous. People who have access to this information include the Principal Investigators and research study personnel.

### Do you agree to participate?

Note that you may print this for your records.

- Yes
- No

What is your gender?

- Male
- Female

Please select your age range.

- Less than 18 years
- 18-24 years
- 25-44 years
- 45-64 years
- 65 years and older

Which of the following do you most closely identify with?

- White
- Hispanic or Latino
- African American
- Other race/ethnic group

In which state do you currently reside?

In which county do you currently reside?

First, we would like to know your thoughts on hurricanes. For the questions that follow, "major hurricane" means one with wind speeds above 110 miles per hour or Category 3 or more.

How much risk or danger do you feel you are at from major hurricanes?

Slide the marker to indicate your feeling on a scale of 0 (none at all) to 100 (extreme).

|                                                                                     |  | 0 10 20 30 40 50 60 70 80 90 100 |                       |                            |                       |                       |
|-------------------------------------------------------------------------------------|--|----------------------------------|-----------------------|----------------------------|-----------------------|-----------------------|
| Feeling at risk to hurricanes                                                       |  |                                  |                       |                            |                       |                       |
| Tell us how much you agree with the following statements.                           |  | Strongly disagree                | Somewhat disagree     | Neither agree nor disagree | Somewhat agree        | Strongly agree        |
| I'm worried about the danger of a storm surge on the Gulf Coast.                    |  | <input type="radio"/>            | <input type="radio"/> | <input type="radio"/>      | <input type="radio"/> | <input type="radio"/> |
| A storm surge can have fatal consequences for the coastal area and its inhabitants. |  | <input type="radio"/>            | <input type="radio"/> | <input type="radio"/>      | <input type="radio"/> | <input type="radio"/> |
| Living on the Gulf Coast is a threat to my safety.                                  |  | <input type="radio"/>            | <input type="radio"/> | <input type="radio"/>      | <input type="radio"/> | <input type="radio"/> |
| I greatly expect storm surge to cause floods in coastal areas.                      |  | <input type="radio"/>            | <input type="radio"/> | <input type="radio"/>      | <input type="radio"/> | <input type="radio"/> |
| When I think of floods, I feel concerned.                                           |  | <input type="radio"/>            | <input type="radio"/> | <input type="radio"/>      | <input type="radio"/> | <input type="radio"/> |

How much harm do you think would come to you personally (to your family, property, job, etc.) if the following were to happen? Assume each hazard is of moderate intensity.

|                              | None                  | A little              | Some                  | A Lot                 |
|------------------------------|-----------------------|-----------------------|-----------------------|-----------------------|
| Hurricane wind               | <input type="radio"/> | <input type="radio"/> | <input type="radio"/> | <input type="radio"/> |
| Hurricane storm surge        | <input type="radio"/> | <input type="radio"/> | <input type="radio"/> | <input type="radio"/> |
| Flooding from rainfall       | <input type="radio"/> | <input type="radio"/> | <input type="radio"/> | <input type="radio"/> |
| Flooding from river overflow | <input type="radio"/> | <input type="radio"/> | <input type="radio"/> | <input type="radio"/> |
| Tornado                      | <input type="radio"/> | <input type="radio"/> | <input type="radio"/> | <input type="radio"/> |

How much trust do you have in federal, state, and local government to protect you in a disaster event?

|                                        | None                  | A little              | Some                  | A lot                 |
|----------------------------------------|-----------------------|-----------------------|-----------------------|-----------------------|
| Federal government                     | <input type="radio"/> | <input type="radio"/> | <input type="radio"/> | <input type="radio"/> |
| State government                       | <input type="radio"/> | <input type="radio"/> | <input type="radio"/> | <input type="radio"/> |
| Local government (your county or city) | <input type="radio"/> | <input type="radio"/> | <input type="radio"/> | <input type="radio"/> |

Consider the following pair of statements. Which comes closest to your personal view?

- Government has a responsibility to help people respond and recover from natural disasters.
- Individuals have a responsibility to be self-sufficient when it comes to natural disasters.

Did a hurricane this year in the Gulf Coast region threaten you or your community?

- Yes
- No

Thinking back to the days and hours before the hurricane made landfall, how much risk or danger did you feel your home and family were at to the following?

|             | Low                   | Medium                | High                  |
|-------------|-----------------------|-----------------------|-----------------------|
| Wind        | <input type="radio"/> | <input type="radio"/> | <input type="radio"/> |
| Flood       | <input type="radio"/> | <input type="radio"/> | <input type="radio"/> |
| Storm surge | <input type="radio"/> | <input type="radio"/> | <input type="radio"/> |

Did you evacuate due to the threat of the hurricane?

- Yes
- No

| How much of your decision to evacuate (or not) was based on information you received from... | Completely            | Somewhat              | No influence          |
|----------------------------------------------------------------------------------------------|-----------------------|-----------------------|-----------------------|
| The media                                                                                    | <input type="radio"/> | <input type="radio"/> | <input type="radio"/> |
| Local authorities                                                                            | <input type="radio"/> | <input type="radio"/> | <input type="radio"/> |
| Neighbors                                                                                    | <input type="radio"/> | <input type="radio"/> | <input type="radio"/> |



What kind of home do you live in?

- Mobile home or trailer
- Single-family home, not attached to another house
- Single-family home, attached such as a duplex/quadriplex
- Apartment in an apartment building
- Other (please specify): \_\_\_\_\_

Do you own or rent your home?

- Own
- Rent

Do you carry the following insurance policies on your home?

|                   | Yes                   | No                    | I don't know.         |
|-------------------|-----------------------|-----------------------|-----------------------|
| Flood insurance   | <input type="radio"/> | <input type="radio"/> | <input type="radio"/> |
| Wind insurance    | <input type="radio"/> | <input type="radio"/> | <input type="radio"/> |
| Content insurance | <input type="radio"/> | <input type="radio"/> | <input type="radio"/> |

Generally speaking, would you say that most people can be trusted or that you can't be too careful in dealing with people?

- Can trust
- Cannot trust
- Depends

What is your age (in years)?

▼ 18 ... 100

Which race do you most closely identify with?

- White or Caucasian
- African-American
- Asian-American
- American-Indian
- Pacific-Islander American
- Mixed Race
- Other \_\_\_\_\_
